# Supplementary material for: Salinomycin induces autophagic cell death in salinomycin-sensitive melanoma cells through inhibition of autophagic flux
Source: PubMed Central journal article supplement (PMC7595060; doi:10.1038/s41598-020-75598-1), 2020-10-28

# **Salinomycin Induces Autophagic Cell Death in Salinomycin-Sensitive Melanoma Cells through Inhibition of Autophagic Flux**

**Yajing Liu<sup>1,4#</sup>, Yinghua Hao<sup>1,#</sup>, Yuxia Li<sup>1</sup>, Yadan Zheng<sup>1</sup>, Jiajing Dai<sup>1</sup>, Fubo Zhong<sup>1</sup>, Wei Wei<sup>2\*</sup>, Zhengyu Fang<sup>1,3\*</sup>**

<sup>1</sup>Biomedical Research Institute, Shenzhen Peking University-Hong Kong University of Science and Technology Medical Center, Shenzhen, 518036, China;

<sup>2</sup>Department of Thyroid and Breast Surgery , Peking University Shenzhen Hospital, Shenzhen, 518036, China;

<sup>3</sup>Clinical Research Institute, Shenzhen Peking University-Hong Kong University of Science and Technology Medical Center, Shenzhen, 518036, China;

<sup>4</sup>Department of Medical Genetics, Institute of Basic Medical Sciences, Chinese Academy of Medical Sciences, Beijing, 100005, China.

#These authors contributed equally to this work.

## Supplementary Data

Supplementary Fig.S1

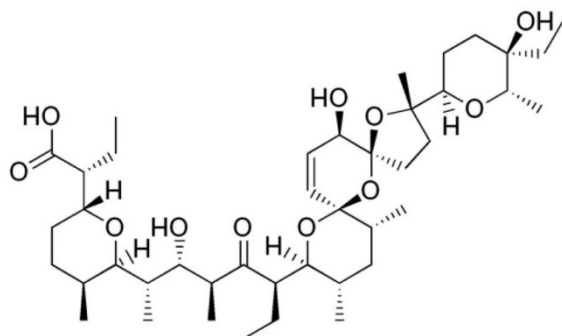

Supplementary Fig.S1: The structural formula of salinomycin.

Supplementary Fig.S2

**A**

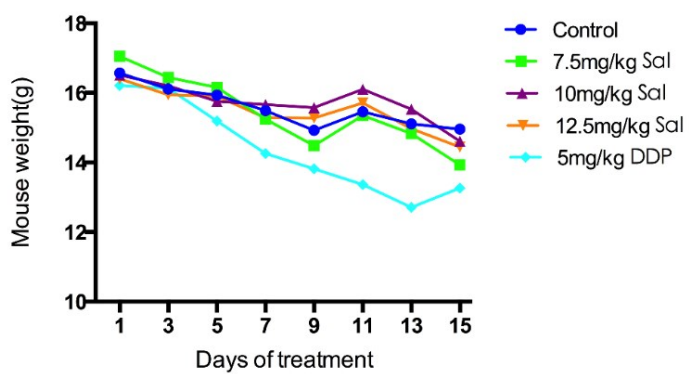

**B**

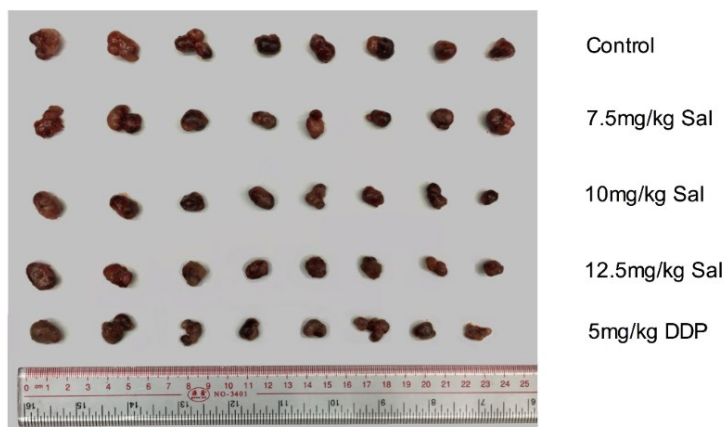

Supplementary Fig.S2: Sal had an inhibitory effect on the tumor growth *in vivo*. (A) The body weight curve of five groups during 15 days of treatment. (B) The photo of mice tumor tissues dissected on the 15th day of treatment.

**Supplementary Fig.S3**

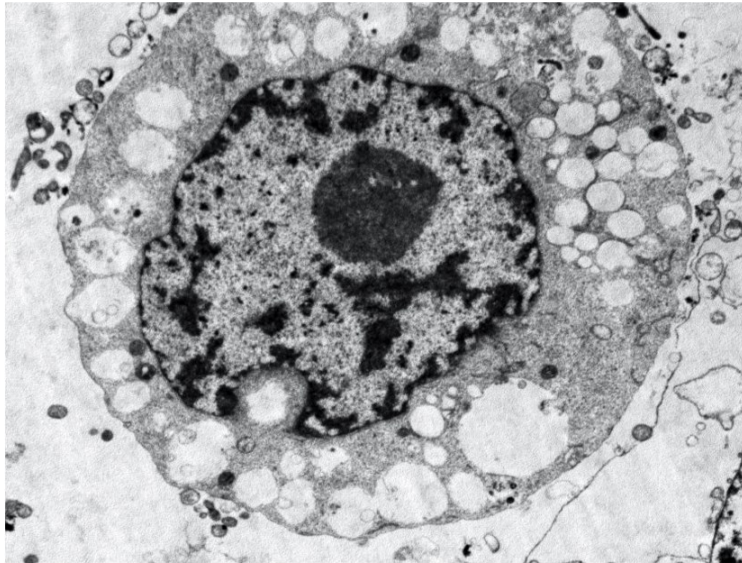

**Supplementary Fig.S3: Typical apoptosis morphological features were observed in a few SK-Mel-19 cells. EM image showing chromatin condensation and margination in 1.0µM Sal-treated SK-Mel-19 cell.**

**Supplementary Fig.S4**

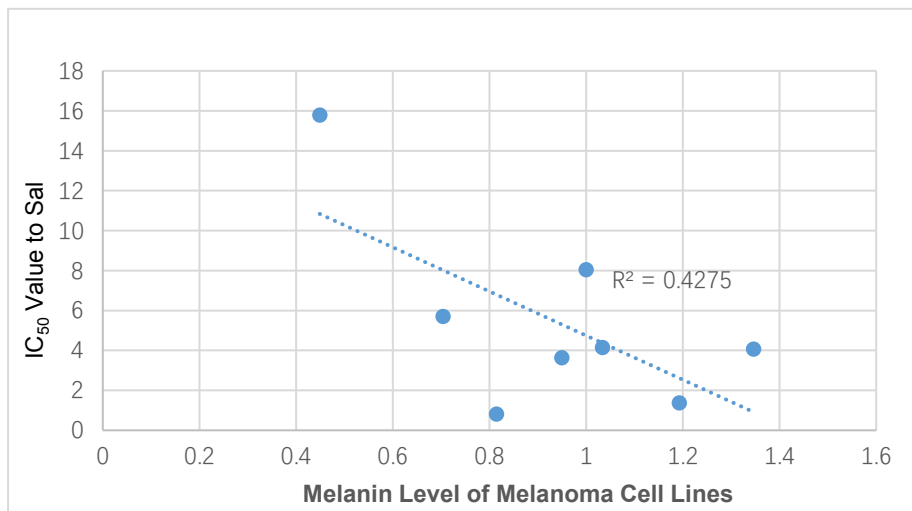

**Supplementary Fig.S4: There is no correlation between the sensitivity to Sal and the pigmentation of eight melanoma cell lines.**

**Supplementary Table S1: Detailed information of clinical characteristics of melanoma patients**

| No. | Gender | Age | Location | Stage | Smoking history | Family history |
|-----|--------|-----|----------|-------|-----------------|----------------|
| 1   | male   | 51  | foot     | II    | yes             | none           |
| 2   | male   | 63  | neck     | I     | yes             | none           |

---

|    |        |    |         |     |      |      |
|----|--------|----|---------|-----|------|------|
| 3  | male   | 35 | face    | I   | yes  | yes  |
| 4  | female | 59 | foot    | III | none | none |
| 5  | male   | 62 | hand    | II  | yes  | none |
| 6  | female | 52 | arm     | II  | none | none |
| 7  | male   | 45 | back    | III | none | yes  |
| 8  | male   | 66 | foot    | IV  | yes  | none |
| 9  | male   | 39 | body    | II  | yes  | none |
| 10 | male   | 54 | arm     | II  | yes  | none |
| 11 | female | 36 | face    | II  | none | none |
| 12 | female | 38 | foot    | III | none | none |
| 13 | male   | 62 | leg     | IV  | yes  | none |
| 14 | male   | 60 | face    | I   | yes  | none |
| 15 | female | 43 | chest   | II  | none | none |
| 16 | male   | 50 | back    | III | none | none |
| 17 | male   | 33 | hand    | II  | yes  | none |
| 18 | female | 31 | abdomen | II  | none | none |
| 19 | male   | 58 | neck    | I   | none | none |
| 20 | male   | 53 | hand    | II  | yes  | none |
| 21 | male   | 57 | foot    | IV  | yes  | none |
| 22 | male   | 47 | finger  | I   | yes  | none |
| 23 | female | 40 | foot    | II  | none | none |
| 24 | female | 33 | scalp   | III | none | yes  |
| 25 | female | 67 | leg     | IV  | none | none |
| 26 | male   | 53 | abdomen | II  | yes  | none |
| 27 | male   | 56 | foot    | III | none | none |
| 28 | female | 63 | scalp   | II  | none | none |
| 29 | male   | 40 | arm     | II  | yes  | none |
| 30 | male   | 47 | foot    | III | yes  | none |
| 31 | male   | 57 | leg     | IV  | yes  | none |
| 32 | female | 50 | foot    | II  | none | none |
| 33 | male   | 55 | chest   | II  | none | none |
| 34 | female | 28 | leg     | III | none | yes  |
| 35 | male   | 26 | hand    | I   | none | none |
| 36 | male   | 72 | finger  | II  | yes  | none |
| 37 | female | 41 | face    | II  | none | none |
| 38 | male   | 60 | neck    | II  | yes  | none |
| 39 | female | 37 | back    | III | none | none |
| 40 | male   | 46 | foot    | IV  | none | yes  |
| 41 | male   | 61 | foot    | II  | yes  | none |
| 42 | male   | 51 | chest   | III | yes  | none |
| 43 | male   | 48 | foot    | II  | none | none |

---

**Supplementary Table S2: Some cell lines that were sensitive to Sal were not sensitive to cisplatin.**

Comparison of IC<sub>50</sub> of Sal and DDP in eight melanoma cell lines.

| Melanoma cell lines | IC <sub>50</sub> of Sal | IC <sub>50</sub> of DDP |
|---------------------|-------------------------|-------------------------|
| M7                  | 8.05                    | 1.57                    |
| M8                  | 15.78                   | 8.88                    |
| M21                 | 1.38                    | 1.68                    |
| M29                 | 3.63                    | 8.91                    |
| SK-MEL-1            | 4.15                    | 5.37                    |
| SK-MEL-19           | 0.82                    | 10.16                   |
| SK-MEL-103          | 4.07                    | 6.95                    |
| A375                | 5.71                    | 11.43                   |

**Uncropped Western Blot Images**

Figure 2B-Cleaved PARP1

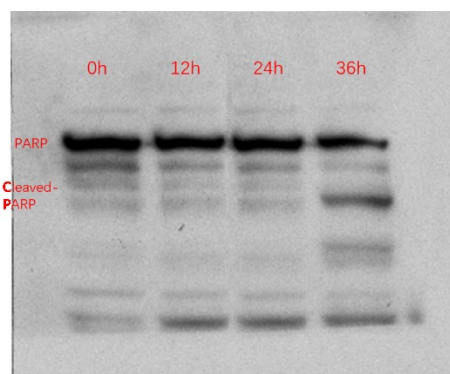

Figure 2B-Cleaved Caspase3

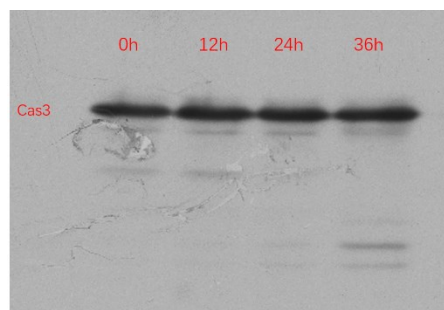

Figure 2B-Caspase9&Cleaved Caspase9&B2M

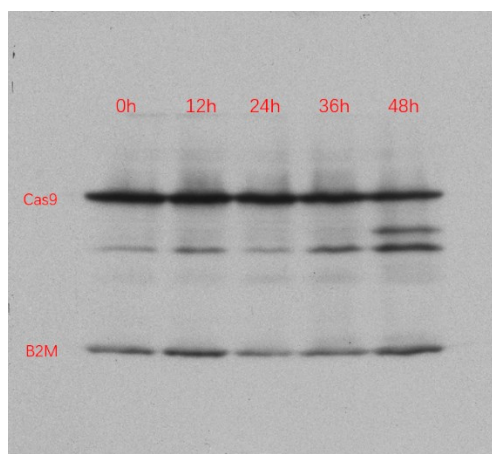

Figure 2C-Cleaved Caspase3

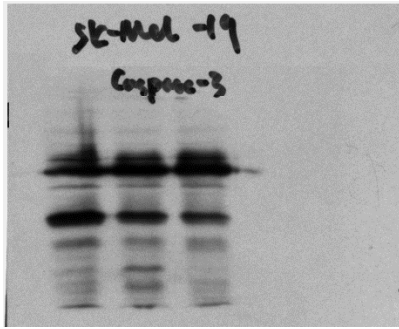

Figure 2C-B2M

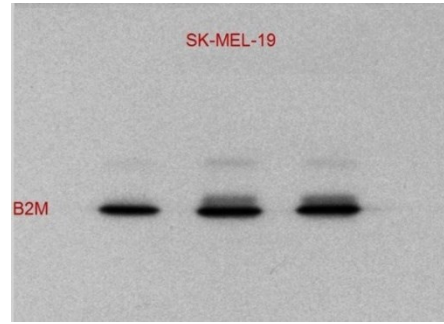

Figure 3A-LC3

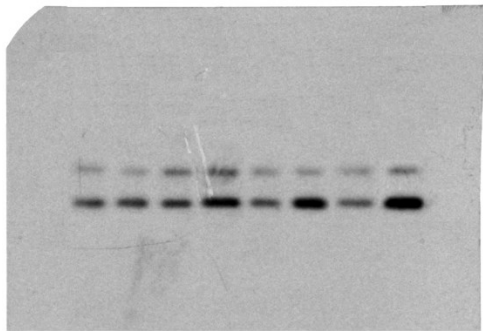

Figure 3A-B2M

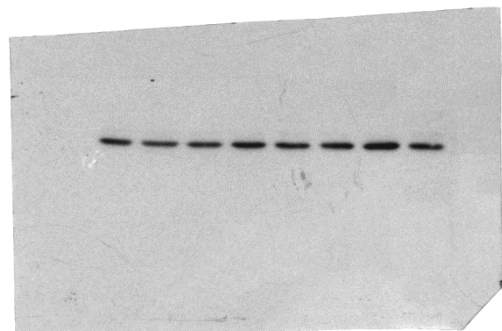

Figure 3B-Beclin-1

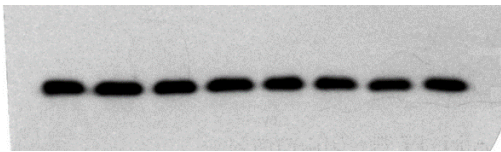

Figure 3B-B2M

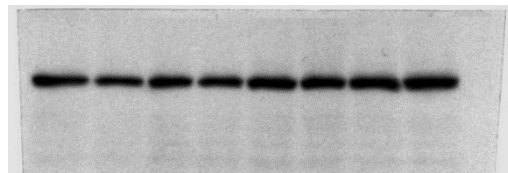

Figure 4A-P62&B2M

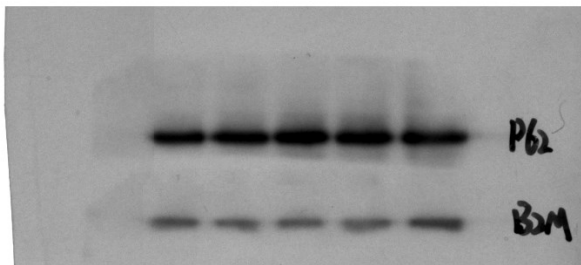

Figure 4D-Ubiquitin

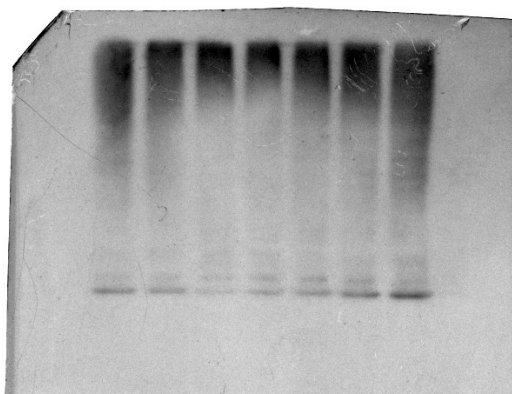

Figure 4D-B2M

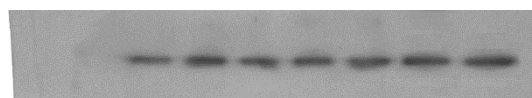

Figure 4E-LC3&B2M

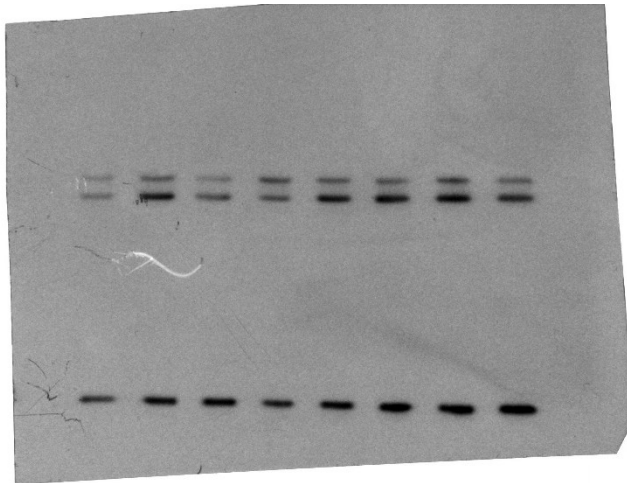

Figure 6B-Bip/GRP78

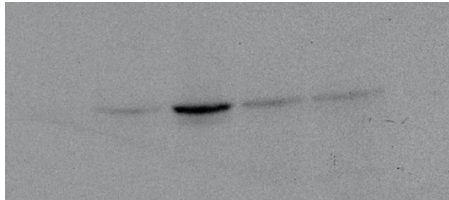

Figure 6B-IRE1a

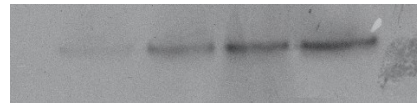

Figure 6B-P-PERK

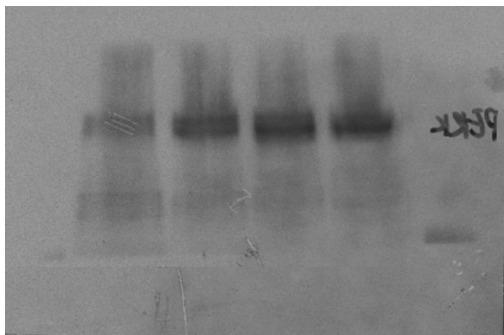

Figure 6B- P-eIF2a

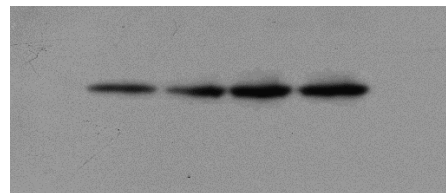

Figure 6B- CHOP & B2M

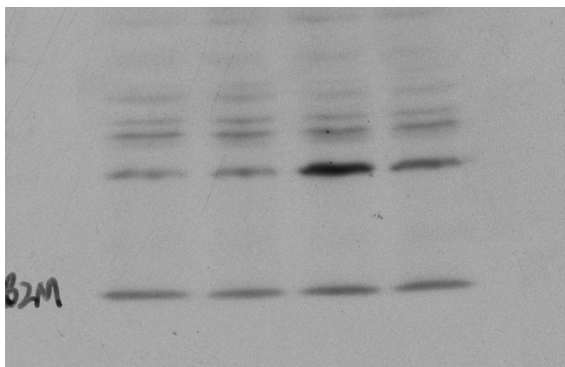

Supplement: 41598_2020_75598_MOESM1_ESM.pdf [file 41598_2020_75598_MOESM1_ESM.pdf]
